# Supplementary material for: Effect of kimchi intake on body weight of general community dwellers: a prospective cohort study
Source: Royal Society of Chemistry journal article supplement (doi:10.1039/d2fo03900a), 2023-01-01
Supplement: d2fo03900a1.pdf [file d2fo03900a1.pdf]

1 **Effect of kimchi intake on body weight of general community dwellers: a prospective cohort study**

2

3 **Supplementary Table 1.** BMI information according to total kimchi intake or intake of different types of kimchi  
4 on risk assessment study (N = 20,066).

|                            | Men          |               |              | women        |               |              |
|----------------------------|--------------|---------------|--------------|--------------|---------------|--------------|
|                            | Baseline BMI | Follow-up BMI | BMI change   | Baseline BMI | Follow-up BMI | BMI change   |
| <b>Total kimchi intake</b> |              |               |              |              |               |              |
| Q1                         | 26.91 ± 1.68 | 26.62 ± 2.01  | -0.29 ± 1.28 | 27.12 ± 1.97 | 26.87 ± 2.42  | -0.24 ± 1.52 |
| Q2                         | 26.96 ± 1.79 | 26.68 ± 2.10  | -0.28 ± 1.23 | 27.20 ± 2.11 | 26.93 ± 2.48  | -0.28 ± 1.54 |
| Q3                         | 26.95 ± 1.78 | 26.68 ± 2.12  | -0.27 ± 1.25 | 27.25 ± 2.04 | 27.04 ± 2.45  | -0.21 ± 1.51 |
| Q4                         | 27.00 ± 1.74 | 26.73 ± 2.10  | -0.27 ± 1.26 | 27.20 ± 2.04 | 26.98 ± 2.41  | -0.22 ± 1.53 |
| Q5                         | 27.05 ± 1.79 | 26.76 ± 2.11  | -0.29 ± 1.30 | 27.33 ± 2.16 | 27.11 ± 2.51  | -0.22 ± 1.48 |
| <b>Baechu kimchi</b>       |              |               |              |              |               |              |
| Q1                         | 26.95 ± 1.73 | 26.64 ± 2.06  | -0.31 ± 1.31 | 27.08 ± 1.96 | 26.80 ± 2.41  | -0.28 ± 1.51 |
| Q2                         | 26.99 ± 1.80 | 26.73 ± 2.10  | -0.26 ± 1.21 | 27.22 ± 2.02 | 27.00 ± 2.42  | -0.22 ± 1.53 |
| Q3                         | 26.89 ± 1.69 | 26.63 ± 2.03  | -0.26 ± 1.24 | 27.26 ± 2.08 | 27.00 ± 2.44  | -0.25 ± 1.53 |
| Q4                         | 26.95 ± 1.72 | 26.64 ± 2.06  | -0.31 ± 1.28 | 27.23 ± 2.05 | 27.00 ± 2.43  | -0.23 ± 1.51 |
| Q5                         | 27.09 ± 1.82 | 26.83 ± 2.18  | -0.26 ± 1.27 | 27.32 ± 2.19 | 27.12 ± 2.56  | -0.20 ± 1.50 |
| <b>Kkakdugi kimchi</b>     |              |               |              |              |               |              |
| Q1                         | 26.93 ± 1.73 | 26.60 ± 2.09  | -0.33 ± 1.29 | 27.23 ± 2.08 | 27.01 ± 2.43  | -0.22 ± 1.48 |
| Q2                         | 26.91 ± 1.72 | 26.62 ± 2.02  | -0.30 ± 1.26 | 27.17 ± 1.98 | 26.91 ± 2.40  | -0.26 ± 1.54 |
| Q3                         | 26.99 ± 1.75 | 26.75 ± 2.11  | -0.24 ± 1.24 | 27.24 ± 2.10 | 27.01 ± 2.52  | -0.22 ± 1.56 |
| Q4                         | 27.00 ± 1.78 | 26.78 ± 2.09  | -0.22 ± 1.19 | 27.21 ± 2.06 | 26.94 ± 2.45  | -0.27 ± 1.52 |
| Q5                         | 27.04 ± 1.80 | 26.73 ± 2.12  | -0.31 ± 1.33 | 27.25 ± 2.11 | 27.05 ± 2.47  | -0.20 ± 1.48 |
| <b>Nabak kimchi</b>        |              |               |              |              |               |              |
| Q1                         | 26.98 ± 1.75 | 26.71 ± 2.11  | -0.28 ± 1.27 | 27.22 ± 2.03 | 27.03 ± 2.41  | -0.19 ± 1.54 |
| Q2                         | 26.96 ± 1.76 | 26.69 ± 2.17  | -0.26 ± 1.25 | 27.21 ± 2.07 | 26.95 ± 2.48  | -0.26 ± 1.53 |
| Q3                         | 26.98 ± 1.75 | 26.73 ± 2.06  | -0.25 ± 1.22 | 27.14 ± 2.03 | 26.94 ± 2.45  | -0.20 ± 1.54 |
| Q4                         | 26.94 ± 1.73 | 26.64 ± 2.01  | -0.30 ± 1.24 | 27.28 ± 2.15 | 27.06 ± 2.52  | -0.22 ± 1.48 |
| Q5                         | 27.02 ± 1.79 | 26.70 ± 2.10  | -0.32 ± 1.34 | 27.24 ± 2.03 | 26.93 ± 2.41  | -0.31 ± 1.49 |

5 BMI change was calculated by subtracting follow-up BMI from baseline BMI.

6
